# Supplementary material
Source: PubMed Central journal article supplement (PMC1500862)
Supplement: 7601178s4.pdf [file 7601178s4.pdf]

## Supplement 4: Additional Material and Methods

### **Protein expression plasmids**

pGEX-4T1-pol $\iota$  [492-715] (pAR208) (Kannouche *et al*, 2002) and pET16b-PCNA (pAV38)(Vidal *et al*, 2004) have been described previously. To generate the pGEX-4T1-pol $\iota$  [492-715] harboring the P692R mutation (pBP112), the 0.7 kb *EcoRI-SalI* fragment from pGBKT7-pol $\iota$  [P692R] (pBP102) was cloned into pGEX-4T1 (Amersham Biosciences, Piscataway, NJ). Plasmid pBP114, expressing full-length GST-pol $\iota$  [P692R] was constructed by subcloning an *NcoI-PstI* fragment of pBP102 into the baculovirus expression vector, pJM299 (Tissier *et al*, 2000).

To generate GFP-fusion proteins for *in situ* fluorescent studies, *EcoRI* and *BamHI* fragments of pAVR76 and pAR116 were cloned into pECFP-pol $\iota$  digested with *EcoRI* and *BamHI*. These constructs contain more 3'-UTR than the parental pECFP-pol $\iota$  (Kannouche *et al*, 2002). The wild-type and P692R ORFs were then cloned into the *XhoI* and *BamHI* sites of pEGFP-C1 (Clontech).

pGEX-4T1-pol $\eta$  [581-713] (pWC9) was constructed by amplifying the 3' end of *POLH* using PCR primers EtaC1 and EtaC2 and cloning the amplicon into the *EcoRI* and *SmaI* sites of pGEX-4T1. The pol $\eta$ -H654A mutation (with a silent *NsiI* restriction site) was generated by site-directed mutagenesis using primers PolHH654A1 and PolHH654A2 and cloned into pESC-Leu pol $\eta$ . The region was then subcloned as a *BsgI* fragment into pFastbac XPV-His (pBP161), or as a *KpnI-XhoI* fragment to generate pGEX-4T1-pol $\eta$  [581-713] H654A (pBP162).
